# Supplementary material
Source: MDPI journal article supplement (https://www.mdpi.com/2227-9717/9/8/1400)
Supplement: s1 [file s1]

## Supplementary Materials

### Effect of Salinity on Cr(VI) Bioremediation by Algal-bacterial Aerobic Granular Sludge Treating Synthetic Wastewater

Bach Van Nguyen <sup>1,2,a</sup>, Xiaojing Yang <sup>1,3,a</sup>, Shota Hirayama <sup>1</sup>, Jixiang Wang <sup>1</sup>, Ziwen Zhao <sup>1</sup>, Zhongfang Lei <sup>1,\*</sup>, Kazuya Shimizu <sup>1</sup>, Zhenya Zhang <sup>1</sup> and Sinh Xuan Le <sup>2</sup>

<sup>1</sup> Graduate School of Life and Environmental Sciences, University of Tsukuba, 1-1-1 Tennodai, Tsukuba, Ibaraki 305-8572, Japan

<sup>2</sup> Institute of Marine Environment and Resources, Viet Nam Academy of Science and Technology, Vietnam

<sup>3</sup> School of Environmental Science and Engineering, Sun Yat-sen University, Guangzhou, China

<sup>a</sup> These authors contributed equally to this work.

\* Correspondence: lei.zhongfang.gu@u.tsukuba.ac.jp (Z. Lei)

## Materials and Methods

### *Chemical fractionation*

In this study, chemical fractionation was performed according to the sequential extraction procedure of Tessier et al. [1] with several modifications to extract six chemical fractions, including (1) F1, water-soluble; (2) F2, exchangeable; (3) F3, carbonate bound; (4) F4, Fe/Mn oxides bound; (5) F5, organic matter bound and (6) F6, residual fraction. A detailed step-by-step extraction procedure of fractions was described by our previous study [2].

### *Fourier transform infrared spectroscopy (FTIR)*

The granule samples (including the algal-bacterial AGS initially and the end of stage IV from R1 and R2) were firstly dried and then grounded to a powder. The infrared spectra of those prepared granule samples were recorded in potassium

bromide (KBr) pellets by a FTIR (JASCO FTIR-300, Japan) with the range of 400–4000  $\text{cm}^{-1}$ .

### References

1. Tessier, A.; Campbell, P. G. C.; Bisson, M. Sequential extraction procedure for the speciation of particulate trace metals. *Anal. Chem.* **1979**, *51* (7), 844–851.
2. Yang, X.; Zhao, Z.; Nguyen, B. V.; Hirayama, S.; Tian, C.; Lei, Z.; Shimizu, K.; Zhang, Z. Cr(VI) bioremediation by active algal-bacterial aerobic granular sludge: Importance of microbial viability, contribution of microalgae and fractionation of loaded Cr. *J. Hazard. Mater.* **2021**, *418*, 126342.

### Results and Discussion

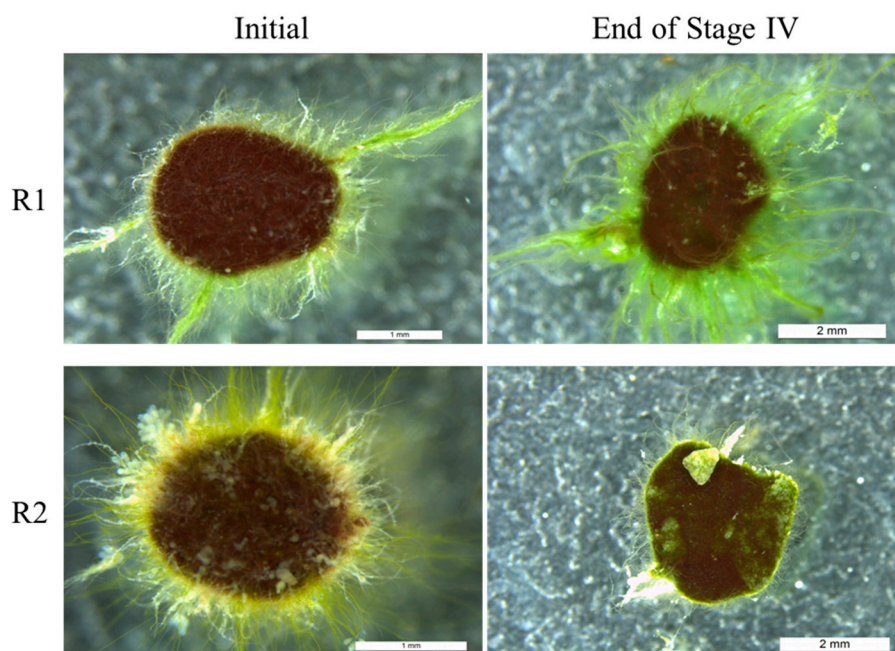

Fig. S1. Morphological changes of algal-bacterial AGS from R1 and R2 at the beginning and the end of the test, respectively.

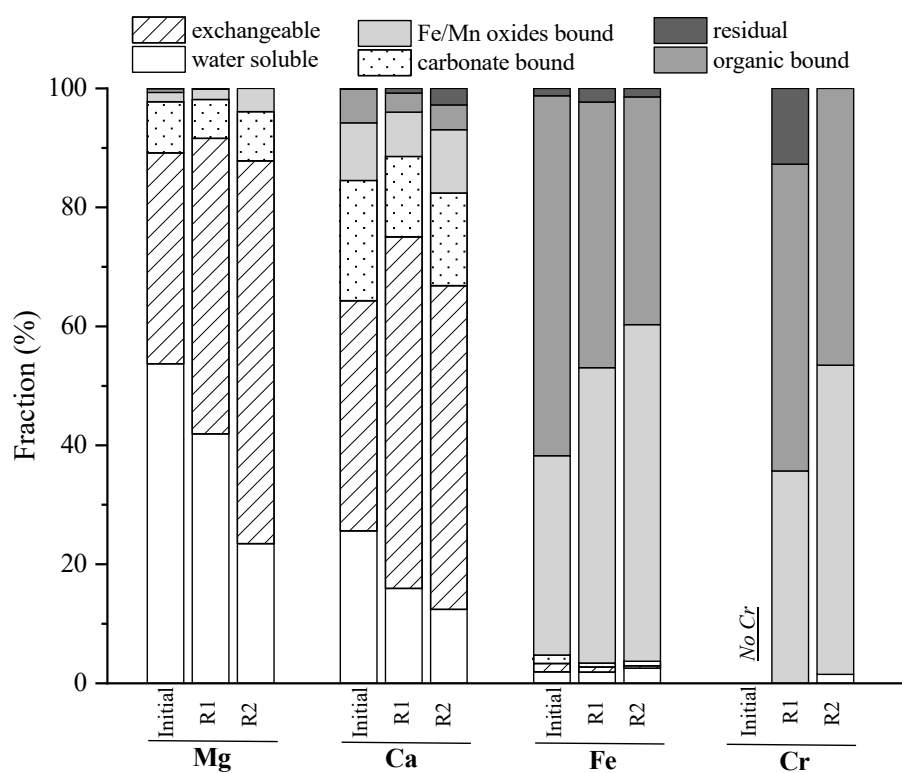

Fig. S2. Chemical fractionation of different metals extracted from the Cr-loaded algal-bacterial granules in R1 and R2, respectively.

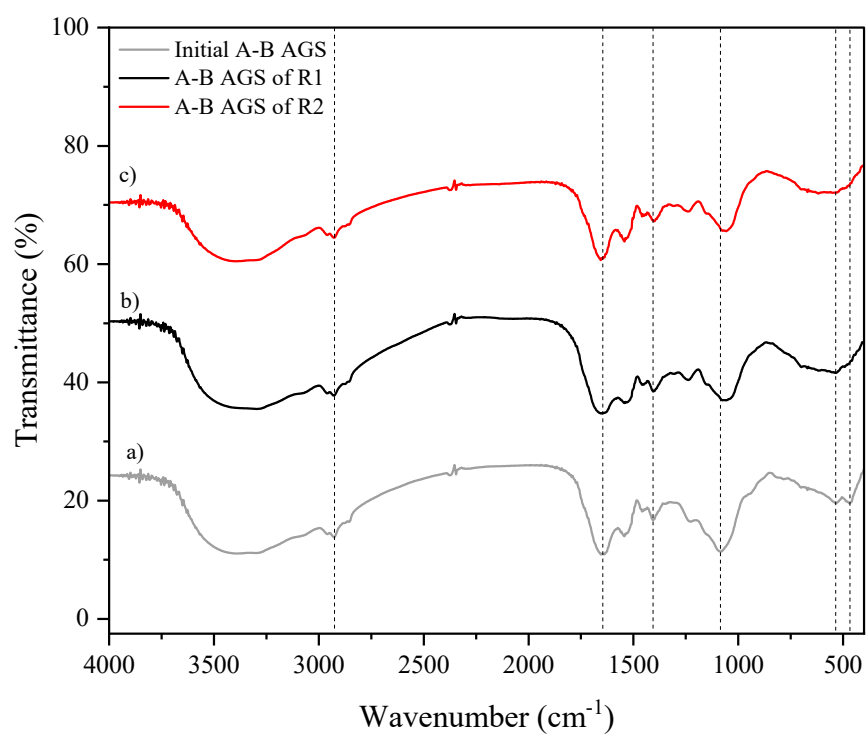

Fig. S3. FTIR spectra of (a) initial algal-bacterial AGS, (b) the granules from R1 (no salinity exposure) at the end of test, and (c) the granules from R2 (1% salinity exposure) at the end of test.
